# The relationship between interpregnancy interval (IPI) and mother's preceding pregnancies (PP)

July 6, 2015

Michel C. Vernier<sup>1\*</sup>, Michael Schulzer<sup>2,3</sup>, Pierre R. Vernier<sup>4</sup>

School of Population and Public Health

University of British Columbia

Vancouver, BC, Canada V6T 1Z3

<sup>1</sup> School of Population and Public Health, University of British Columbia, Vancouver, BC Canada V6T 1Z3

<sup>2</sup> Departments of Medicine, University of British Columbia, Vancouver, BC Canada V6T 1Z1

<sup>3</sup> Departments of Statistics, University of British Columbia, Vancouver, BC Canada V6T 1Z1

<sup>4</sup> Department of Renewable Resources, University of Alberta, Edmonton, AB Canada T6G 2P5

\*Correspondence to: Michel C. Vernier, School of Population and Public Health, UBC, 2206 East

Mall, Vancouver, BC Canada V6T 1Z3. E-mail address: [michel.vernier@ubc.ca](mailto:michel.vernier@ubc.ca)

# Abstract

**Introduction:** Following the investigation of the mother's preceding pregnancies on fetal development and postnatal survival of the neonate, we turned our attention to an earlier period, that is the interval separating the onset of the current pregnancy from the end of the preceding one. The objectives of this study is to investigate the variations of interpregnancy interval length associated to the mother's preceding pregnancies.

**Methods:** A population of 7773 neonates, alive at the time of hospital discharge, were divided into cohorts according to the current neonate's sex and number and sex of the mother's preceding pregnancies. Interpregnancy interval average of each cohort of same neonate's sex and mother's parity, but different configuration of preceding pregnancies, were measured and compared.

**Results:** A positive association was found between mother's preceding pregnancies and length of interpregnancy interval when current pregnancy and preceding pregnancy were of the same sex, and a negative association when they were of opposite sex.

**Discussion:** Interpregnancy interval length follows a pattern regarding the gravida's preceding pregnancy similar to the other early life indicators pattern, birth weight, placenta weight, gestation length and neonatal survival. Our results confirm and complete an immunological explanation of the indicators variations associated to the gravida's preceding pregnancy.

# Introduction

A recent analysis of 27,243 neonates has shown a significant association between the mother's preceding pregnancies and fetal development and neonatal survival [1]. A positive association was found when current conceptus and conceptuses of preceding pregnancies were of same sex, and a negative association when they were of opposite sex. An immunological hypothesis was put forward to explain the phenomenon. It is based on the sex-linked concepto-gravidic antigenic dissimilarity, due to paternal antigens of the conceptus, and it is capable of affecting fetal development and neonatal survival through a selective implantation process [1].

Early in gestation, the implantation of the blastocyst is a critical stage that a large number of conceptuses fail to achieve [2, 3, 4, 5, 6]. Implantation seems to be immunologically controlled [7, 8, 5]. Both, male and female conceptuses, can induce an immune reaction from the gravida. The concepto-gravidic dissimilarity, due to paternal antigens of the conceptus, favors the implantation of the blastocyst [9, 10, 11, 12, 5, 6], provides a selective advantage to the latter [13, 6, 14] and primes the gravida vis-à-vis some paternal antigens. Then, on the occasion of a subsequent pregnancy, the previous sensitization of the gravida reduces both the concepto-gravidic dissimilarity effect and the implantation advantage [15, 12, 16, 14]. Thus, the blastocyst carrying a given set of sex-linked paternal antigens, against which the mother has been previously sensitized, would implant less easily than the blastocyst whose mother has not been so exposed. However, if the former survives the implantation, it will be more successful than the latter in pursuing the gestation. This translates, in population terms, to survival of the strong and culling of the weak [13, 17, 18], as expressed in fetal development and neonatal survival differentials [1]. So, selective implantation favors in number blastocysts preceded by mother's

pregnancies of the opposite sex, and in strength, blastocysts preceded by mother's pregnancies of same sex as their own. The first effect should be reflected in the post-implantation sex ratios, while the second should be shown in the development and survival differentials associated with the mother's preceding pregnancies.

The present study investigates this phenomenon at a very early stage, that is during the interval separating the onset of the current pregnancy from the end of the immediately preceding pregnancy of the gravida. The influence of mother's preceding pregnancies can be felt long before the onset of the current pregnancy. During the interpregnancy interval 70% of conceptions fail, including 30 before implantation, 30 after implantation but before the missed period, and 10 lost as miscarriage [19]. Therefore 60 % of the lost conceptuses are not clinically recognized. However they can delay the onset of a subsequent pregnancy by prolonging the interpregnancy interval [20]. Many factors are known to influence the IPI length. Our study investigated the variations of interpregnancy length associated with the mother's preceding pregnancies.

## Materials and Methods

The basic information is derived from the Child Health and Development Studies (CHDS). Between August 1959 and September 1966, 20,000 pregnant women, members of the Kaiser Health Plan residing in the San Francisco - East Bay area, reported for prenatal care in some Kaiser clinics. They constituted the CHDS study population. Data on parents and children were obtained from interviews and medical records. The study population represented a broad range of economic, social and educational characteristics, and was not atypical of an employed

population [21]. The current retrospective analysis is based on a sample of the CHDS population which included 7773 neonates who were alive at the time of hospital discharge, and whose mother had been interviewed about her reproductive history. Multiple births and newborns from diabetic mothers were excluded from the study.

The interval separating the beginning of the current pregnancy from the end of the immediately preceding pregnancy (IPI) was used as indicator of early undetected loss, which corresponds to a prolongation of this interval [20]. The current neonates were divided into cohorts according to their sex and the sex and number of the conceptuses of the mother's preceding pregnancies (PP). Comparisons of IPI mean were made between pairs of cohorts of same sex and mother's parity, but of different configuration of preceding pregnancies, mostly same sex preceding pregnancy (SSPP) and opposite sex preceding pregnancy (OSPP). The analysis included parity two, three and four.

## Results

### Characteristics of the participants in "the interpregnancy interval study"

#### \*\*\* TABLE 1 \*\*\*

#### Interpregnancy Interval, sex of the current neonate and mother's parity.

In our study, the average length of time (IPI), separating the onset of the current pregnancy from the termination of the immediately preceding pregnancy was 779 days (26 months) for

either female or male current pregnancy. It includes: 37% intervals of less than 1 year, 27% of between 1 and 2 years, 26% of between 2 and 5 years, and 10% of 5 years or more. The interpregnancy interval of both male and female neonate increased with the parity of the mother (Table 2).

\*\*\* TABLE 2 \*\*\*

**Interpregnancy interval and mother's preceding pregnancy**

At parity 2, (Table 3), the average interpregnancy interval (IPI) of a male neonate preceded by a male pregnancy of its mother was 635 days (21mo), and of a female neonate preceded by a male pregnancy was 787 days (26mo), a difference of 152 days (5mo):  $p=.0022$  in favor of the latter. Likewise, the average IPI of a male neonate preceded by a female pregnancy of its mother was 834 days (28mo) and of a female neonate preceded by a female pregnancy was 687 days (23mo), a difference of 147 days (5mo):  $p=.0156$  in favor of the former. The average IPI of a male neonate preceded by a male pregnancy of its mother was 635 days (21mo), and preceded by a female pregnancy was 834 days (28mo), a difference of 199 days (6.6mo):  $p=.0005$  in favor of the latter. Likewise, the average IPI of a female neonate preceded by a male pregnancy was 787 days (26 mo), and preceded by a female pregnancy was 687 days (23 months), a difference of 100 days (3.3 mo):  $p = .0484$ , in favor of the former.

\*\*\* TABLE 3 \*\*\*

At parity 3, (Table 4), the average interpregnancy interval (IPI) of a male neonate preceded by two male pregnancies of its mother was 876 days, and preceded by two female pregnancies was 903 days, a difference of 27 days in favor of the latter. Likewise, the average IPI of a female neonate preceded by two male pregnancies of its mother was 949 days and preceded by two female pregnancies was 926 days, a difference of 23 days in favor of the former. Finally, at parity 4 the average IPI of a male neonate preceded by 3 male pregnancies of its mother was 948 days, and preceded by 3 female pregnancies was 903 days, a difference of 45 days in favor of the former. Likewise the average IPI of a female neonate preceded by 3 female pregnancies of its mother was 898 days, and preceded by 3 male pregnancies was 728 days, a difference of 170 days  $p = .0879$ , in favor of the former.

#### \*\*\* TABLE 4 \*\*\*

## Discussion

### Interpregnancy interval and mother's preceding pregnancy

At parity 2, the interval between the termination of the preceding pregnancy and the onset of the current one is shorter if the conceptuses of the two pregnancies are of the same sex. Thus, after a male preceding pregnancy, the IPI of the current male neonate is shorter than the IPI of the female neonate (635days vs 787days :  $P = .0022$  ). And, after a female preceding pregnancy, the IPI of the current female neonate is shorter than the IPI of the male neonate (687days vs 834days :  $P = .0156$ ). The difference in both cases is around 5 months, which is statistically significant (Table 3). In the same way, the IPI of a current male neonate born

preceded by a male pregnancy is shorter than born preceded by a female pregnancy (635days vs 834days:  $P=.0005$ ) . And the IPI of a current female neonate born preceded by a female pregnancy is shorter than born preceded by a male pregnancy (687days vs 787days :  $P=.0484$  ). The difference is respectively 6.6 mo for the male neonate and 3.3 mo for the female neonate, which are both statistically significant (Table 3).

### \*\*\* TABLE 5 \*\*\*

At parity 3, the pattern of association between mother's preceding pregnancy and current neonate's interpregnancy interval persists at a lesser degree. Thus the difference between OSPP interval and SSPP interval is 27 days for the male neonate, and 23 days for the female neonate, and none of them is statistically significant (Table 4). Finally at parity 4+, the pattern of association reverses itself with SSPP interval longer than OSPP interval and negative difference between them. This latest reversal could be due to the small number of observations available for analysis. Or it could be due to the conceptus antigens loosing specificity with time or the response decreasing after a while [22, 23]. The value of the interpregnancy interval of the neonate (Table 5) increases between mother's parity 2 and parity 3 of the neonates born after SSPP, as well as born after OSPP, initiating thus a limited parity-linked dose-effect.

### **Immunological selective implantation and interpregnancy interval**

A positive association was found between mother's preceding pregnancy and interpregnancy interval when current pregnancy and preceding pregnancy were of the same sex, and a negative one when they are of opposite sexes. In a previous study [1], a similar pattern of association



between current pregnancy and gravida's preceding pregnancy was found for birth weight, placenta weight, gestation length and neonatal survival. An immunological hypothesis, based on the sex-linked concepto-gravidic antigenic dissimilarity due to paternal antigens of the conceptus was then proposed to explain the phenomenon. The selective implantation favors in number the blastocysts preceded by pregnancies of opposite sex, and favors in strength the blastocysts preceded by pregnancies of same sex as their own. Thus the blastocysts of multiparous gravidas would implant more easily after preceding pregnancies of opposite sex (OSPP) than after preceding pregnancies of same sex (SSPP). As a result, SSPP-blastocysts, ie  $\underline{MM}$  and  $\underline{FE}$ , would be fewer to successfully achieve implantation than OSPP-blastocysts, ie  $\underline{FM}$  and  $\underline{ME}$ . But the former, thanks to the selection process taking place at implantation, would be more successful than the latter in pursuing the gestation.

#### **Tentative explanatory mechanism**

The influence of the gravida's preceding pregnancy on the current one can be felt long before the onset of the latter. During the interpregnancy interval, 70% of all conceptions fail, including 30% before implantation, 30% after implantation but before the missed period, and 10% lost as miscarriage [19]. Therefore 60% of the lost conceptuses are not clinically recognized, and not counted as 'preceding pregnancy'. However they can delay the onset of the current pregnancy by prolonging the IPI [20]. According to the immunological hypothesis, the blastocysts of the conceptions occurring during the interpregnancy interval would implant more easily after a preceding pregnancy of opposite sex (OSPP-blastocyst) than after a preceding pregnancy of same sex as its own (SSPP-blastocyst). In population terms, assuming a primary sex-ratio close to 1/1, more SSPP-conceptuses than OSPP- conceptuses would be eliminated before implantation

while more OSPP-conceptuses than SSPP-conceptuses would be eliminated after implantation. Because conceptus loss before implantation has a shorter life than conceptus loss after implantation, a differential impact would result on IPI in relation to the preceding pregnancies. The IPI of the current neonate succeeding to preceding pregnancies of same sex as its own would be shorter than the IPI of a current neonate succeeding to preceding pregnancies of opposite sex. In our study:

$$\begin{array}{ll} \underline{FM} > \underline{MM} : 834 \text{ vs } 635 & \underline{ME} > \underline{FE} : 787 \text{ vs } 687 \\ \underline{FFM} > \underline{MMM} : 903 \text{ vs } 876 & \underline{MME} > \underline{FFE} : 949 \text{ vs } 903 \end{array}$$

## Conclusion

Our study confirms and completes the role played by the preceding pregnancies of the gravida in the development and survival of her current conceptus. Specifically the study shows a statistically significant association between preceding pregnancies and interpregnancy interval. In order to test the consistency of a correlation between interpregnancy interval and preceding pregnancy a prospective approach with large samples would be necessary.

## References

1. Vernier MC, Mackenzie CJG, Schulzer M, Vernier PR: Influence of the mother's preceding pregnancies on fetal development and postnatal survival of the neonate, in normal pregnancy. An immunological phenomenon? Am J Hum Biol 2010;22:708-715.
2. Bjercke S: Normal implantation is important in order to avoid pregnancy complications and diseases later in life. Tidsskr Nor Laegeforen 1999;119:3903-3908.

- 237 3. Clark DA: Is there any evidence for immunologically mediated or immunologically modifiable  
238 early pregnancy failure? *J Assist Reprod Genet* 2003;20:63-72.
- 239 4. Norwitz ER, Schust DJ, Fisher SJ: Implantation and the survival of early pregnancy. *N Engl J*  
240 *Med* 2001;345:1400-1408.
- 241 5. Tyler A: Approches to the control of fertility based on immunological phenomena. *J*  
242 *Reproduc Fertil* 1961;2:473.
- 243 6. Vatten LJ, Skjaerven R: Offspring sex and pregnancy outcome by length of gestation. *Early*  
244 *Hum Dev* 2004;76:47-54.
- 245 7. Kirby DRS, McWhirter KG, Teitelbaum MS, Darlington CD: A possible immunological  
246 influence on sex ratio. *Lancet* 1967;2:139-140.
- 247 8. Simmons RL, Russel PS: The histocompatibility of fertilized mouse eggs and trophoblast. *Ann*  
248 *NY Acad Sci* 1966;129:35-45.
- 249 9. Ackerman PT, Goolsby CM, Paal NP: A test of the immunoreactive theory of selective male  
250 affliction. *J Pediat Psychol* 1988;13:49-53.
- 251 10. Billington WD: Influence of immunological dissimilarity of mother and fetus on size of  
252 placenta mice. *Nature* 1964;202:317-318.
- 253 11. James DA: Effects of antigenic dissimilarity between mother and foetus of placental size in  
254 mice. *Nature* 1965;205:613-614.
- 255 12. Novitski E, Sandler L: The relationship between parental age, birth order and secondary sex  
256 ratio in humans. *Ann Hum Genetics* 1956;21:123-131.
- 257 13. Bruckner T, Catalano R: The sex ratio and age-specific male mortality: evidence for culling in  
258 utero. *Am J Hum Biol* 2007;19:763-773.

14. Warburton D, Naylor AF: The effect of parity on placental weight and birth weight: an immunological phenomenon? A report of the collaborative study of cerebral palsy. *Am J Hum Genet* 1971;23:41-53.
15. Niswander KR, Gordon M: The women and their pregnancies. WB Saunders Company, Philadelphia 1972.
16. Vernier MC: Sex differential placentation: immunological interactions between male conceptus and gravida during normal pregnancy. *Biol Neonate* 1975;26:76-87.
17. Wells JCK: Natural selection and sex differences in morbidity and mortality in early life. *J Theor Biol* 2000;202:65-76.
18. Trivers RL, Willard DE: Natural selection of parental ability to vary the sex ratio. *Science* 1973;179:90-92.
19. Macklon NS, Geraedts JPM, Fauser BCJM: Conception to ongoing pregnancy: the 'black box' of early pregnancy loss. *Human Reproduction Update* 2002;8(4):333-343.
20. James WH: Stillbirth, neonatal death and birth interval. *Ann. Hum. Genet.* 1968;32:169-172.
21. Van den Berg BJ, Christianson RE, Oechsli FW: The California Child Health and Development Studies of the School of Public Health, University of California at Berkeley. *Paediatr Perinat Epidemiol* 1988;2:265-282.
22. Artlett CM: Pathophysiology of fetal microchimeric cells. *Clin Chim Acta* 2005;360(1-2): 1-8.
23. Nielsen HS, Mortensen L, Nygaard U, Schnor O, Christiansen OB, Andersen A-MN: Brothers and reduction of the birth weight of later-born siblings. *Am J Epidemiol* 2008;167:480-484.

281 Table 1. Characteristics of the participants in the Interpregnancy Interval Study.

---

Number of neonates: 7773.

Sexes: 50.9% male and 49.1% female neonates. Sex ratio: 1.07.

Birth weight (mean): 117.92oz, SD: 17.93

Placenta weight (mean): 16.22oz, SD: 9.4.

Mother's age (mean): 26.4 years, SD: 5.9.

Mother's weight (mean): 129.84lb, SD: 21.26

Mother's height (mean): 64.13in, SD: 2.29

Father's age (mean): 29.9 years, SD: 6.7.

Mother's race: White: 68.33 %, Black: 26.01 %, Others: 5.66 %.

Mother's parities: Primiparous: 30.95 %, Multiparous: 67.12%, Incomplete data: 1.95%

Length of Gestation (mean): 280.76 days, SD: 15.36. Max: 381 days, min: 165 days.

Length of Gestation (mean) of male neonate: 280.48 days, of female neonate: 281.04 days.

---

282

283

284 Table 2. Interpregnancy Interval (IPI), sex of the current neonate and mother's parity.

| Male neonate IPI |      |             |         | Female neonate IPI |      |             |         |
|------------------|------|-------------|---------|--------------------|------|-------------|---------|
| Parity           | n    | mean (days) | std dev | Parity             | n    | mean (days) | std dev |
| 2                | 911  | 701         | 857     | 2                  | 926  | 713         | 869     |
| 3                | 719  | 835         | 909     | 3                  | 711  | 839         | 952     |
| 4                | 474  | 887         | 909     | 4                  | 429  | 843         | 879     |
| 5-7              | 531  | 741         |         | 5-7                | 516  | 762         |         |
| All              | 2635 | 779         |         | All                | 2582 | 779         |         |

285

286

287 Table 3. Interpregnancy interval (IPI) of the current neonate and mother's preceding pregnancy,  
288 at parity 2.

| Current neonate IPI      |              |               |                   |                  |
|--------------------------|--------------|---------------|-------------------|------------------|
| Preceding pregnancy      | Male (days)  | Female (days) | Difference (days) | T-test (p-value) |
| <i>Male prgn</i>         | <u>MM</u>    | <u>ME</u>     | <u>ME-MM</u>      |                  |
|                          | 635          | 787           | 152               | 0.0022           |
| <i>Femal prgn</i>        | <u>FM</u>    | <u>FE</u>     | <u>FM-FE</u>      |                  |
|                          | 834          | 687           | 147               | 0.0156           |
| <i>Difference (days)</i> | <u>FM-MM</u> | <u>ME-FE</u>  |                   |                  |
|                          | 199          | 100           |                   |                  |
| <i>T-test (p-value)</i>  | 0.0005       | 0.0484        |                   |                  |

289

290

291 Table 4. Interpregnancy Interval (IPI) of the current neonate and mother's preceding  
292 pregnancies.

|                                   |              |    | OSPP-SSPP* |            |            |
|-----------------------------------|--------------|----|------------|------------|------------|
|                                   | Configuratio |    | Mean       | Difference | T-test (p- |
|                                   | n            | n  | (days)     | (days)     | value)     |
| <i>Male neonate at parity 2</i>   |              |    |            |            |            |
|                                   |              | 43 |            |            |            |
| Born after a male PP              | <u>MM</u>    | 3  | 635        | 199        | 0.0005     |
|                                   |              | 38 |            |            |            |
| Born after a female PP            | <u>FM</u>    | 8  | 834        |            |            |
| <i>Female neonate at parity 2</i> |              |    |            |            |            |
|                                   |              | 45 |            |            |            |
| Born after a male PP              | <u>ME</u>    | 5  | 787        | 100        | 0.0484     |
|                                   |              | 39 |            |            |            |
| Born after a female PP            | <u>FE</u>    | 4  | 687        |            |            |
| <i>Male neonate at parity 3</i>   |              |    |            |            |            |
|                                   |              | 16 |            |            |            |
| Born after two male PP            | <u>MMM</u>   | 7  | 876        | 27         | ns         |
|                                   |              | 12 |            |            |            |
| Born after two female PP          | <u>FFM</u>   | 3  | 903        |            |            |
| <i>Female neonate at parity 3</i> |              |    |            |            |            |
|                                   |              | 12 |            |            |            |
| Born after two male PP            | <u>MME</u>   | 7  | 949        | 23         | ns         |
|                                   |              | 11 |            |            |            |
| Born after two female PP          | <u>FFE</u>   | 3  | 926        |            |            |
| <i>Male neonate at parity 4+</i>  |              |    |            |            |            |



|                                 |             |    |     |      |        |
|---------------------------------|-------------|----|-----|------|--------|
| Born after three male PP        | <u>MMMM</u> | 81 | 948 | -45  | ns     |
| Born after three female PP      | <u>FFFM</u> | 83 | 903 |      |        |
| <i>Female neonate at parity</i> |             |    |     |      |        |
| <i>4+</i>                       |             |    |     |      |        |
| Born after three male PP        | <u>MMME</u> | 75 | 728 | -170 | 0.0879 |
| Born after three female PP      | <u>FFFE</u> | 59 | 898 |      |        |

---

\* SSPP: same sex preceding pregnancy, OSPP: opposite sex preceding pregnancy.

293

294

295 Table 5. Interpregnancy Interval of the neonate born after same-sex preceding pregnancies  
296 (SSPP) or opposite-sex preceding pregnancies (OSPP).

|                                        |        |     | Interpregnancy interval |         |
|----------------------------------------|--------|-----|-------------------------|---------|
|                                        | Parity | n   | Mean (days)             | Std dev |
| <b>Neonate born after same-sex</b>     |        |     |                         |         |
| <b>Preceding pregnancies</b>           |        |     |                         |         |
| <i>Male neonate</i>                    |        |     |                         |         |
| Born after 1 male pregnancy            | 2      | 433 | 635                     | 665     |
| Born after 2 male pregnancies          | 3      | 167 | 876                     | 880     |
| Born after 3 male pregnancies          | 4+     | 81  | 948                     | 767     |
| <i>Female neonate</i>                  |        |     |                         |         |
| Born after 1 female pregnancy          | 2      | 394 | 687                     | 847     |
| Born after 2 female pregnancies        | 3      | 113 | 926                     | 930     |
| Born after 3 female pregnancies        | 4+     | 59  | 898                     | 798     |
| <b>Neonate born after opposite-sex</b> |        |     |                         |         |
| <b>Preceding pregnancies</b>           |        |     |                         |         |
| <i>Male neonate</i>                    |        |     |                         |         |
| Born after 1 female pregnancy          | 2      | 388 | 834                     | 1048    |
| Born after 2 female pregnancies        | 3      | 123 | 903                     | 908     |
| Born after 3 female pregnancies        | 4+     | 83  | 903                     | 708     |
| <i>Female neonate</i>                  |        |     |                         |         |
| Born after 1 male pregnancy            | 2      | 455 | 787                     | 897     |
| Born after 2 male pregnancies          | 3      | 127 | 949                     | 968     |
| Born after 3 male pregnancies          | 4+     | 75  | 728                     | 648     |
